# Supplementary material for: Exposure to small molecule cocktails allows induction of neural crest lineage cells from human adipose-derived mesenchymal stem cells
Source: PubMed Central journal article supplement (PMC7588063; doi:10.1371/journal.pone.0241125), 2020-10-26

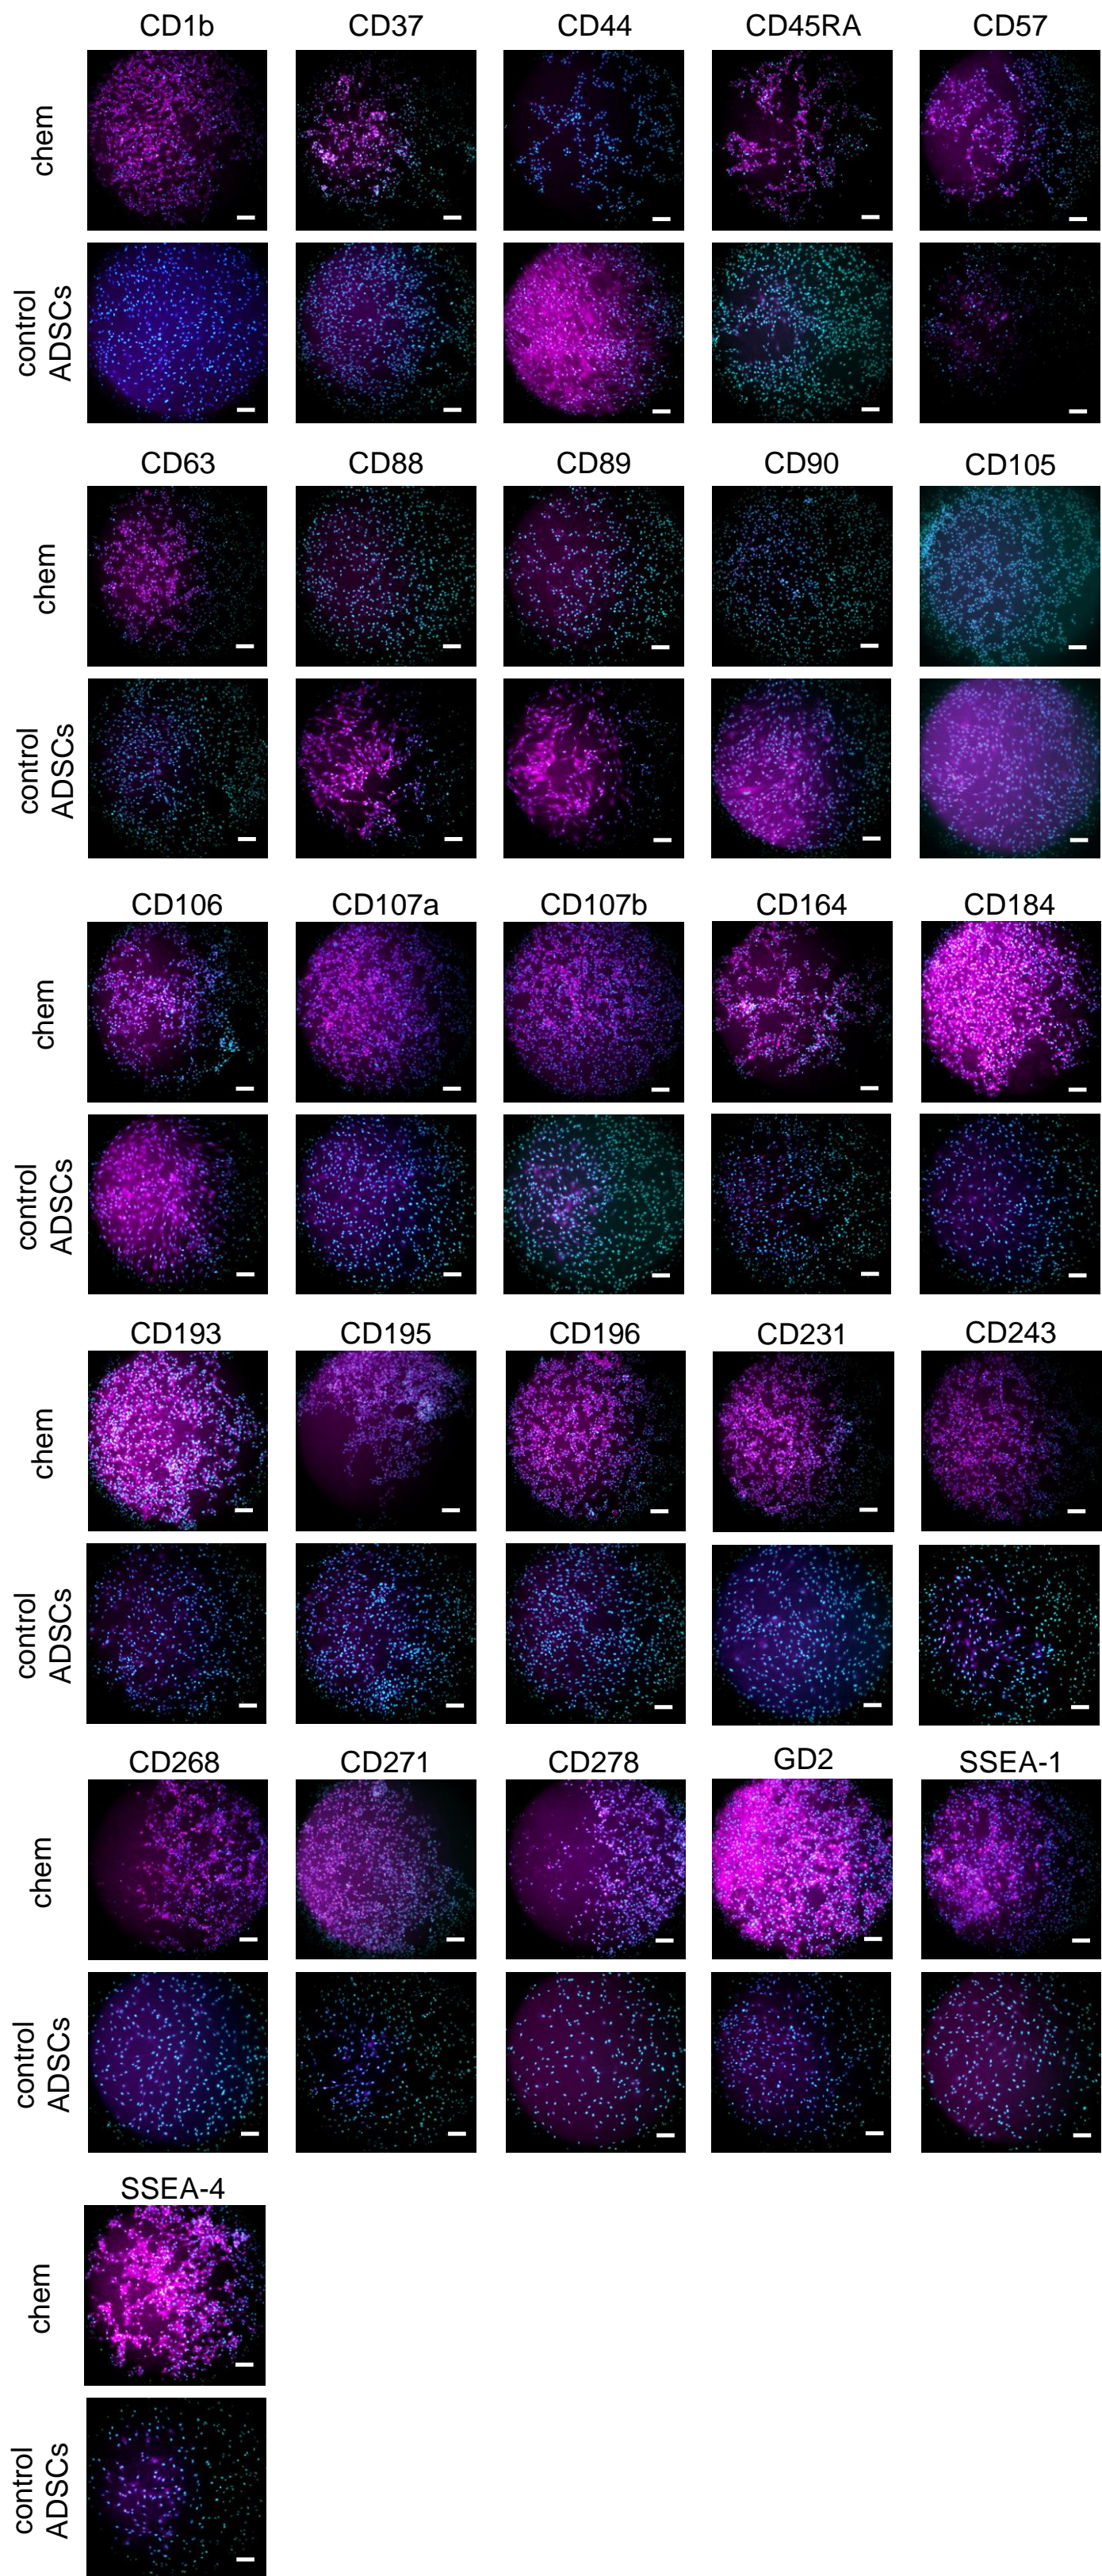

Supplement: pone.0241125.s003.pdf [file pone.0241125.s003.pdf]
